# Supplementary material for: Bioconjugation of a PNA Probe to Zinc Oxide Nanowires for Label-Free Sensing
Source: MDPI journal article supplement (doi:10.3390/nano11020523), 2021-02-18
Supplement: s1 [file s1]

# **SUPPORTING INFORMATION**

## **of**

# **Bioconjugation of a PNA Probe to Zinc Oxide Nanowires for Label-Free Sensing**

**Teresa Crisci<sup>1,2</sup>, Andrea Patrizia Falanga<sup>3</sup>, Maurizio Casalino<sup>1</sup>, Nicola Borbone<sup>4</sup>, Monica Terracciano<sup>4</sup>, Giovanna Chianese<sup>1</sup>, Mariano Giofrè<sup>1</sup>, Stefano D'Errico<sup>4</sup>, Maria Marzano<sup>5</sup>, Ilaria Rea<sup>1\*</sup>, Luca De Stefano<sup>1§</sup>, and Giorgia Oliviero<sup>3§</sup>**

<sup>1</sup> National Research Council, Institute of Applied Sciences and Intelligent Systems, Unit of Naples, 80131 Naples, Italy

<sup>2</sup> Department of Mathematics and Physics, University of Campania Luigi Vanvitelli, 81100 Caserta, Italy

<sup>3</sup> Department of Molecular Medicine and Medical Biotechnology, University of Naples Federico II, 80131 Naples, Italy

<sup>4</sup> Department of Pharmacy, University of Naples Federico II, 80131 Naples, Italy

<sup>5</sup> National Research Council, Institute of Crystallography, 70126, Bari, Italy

\* Corresponding Author: [ilaria.rea@na.isasi.cnr.it](mailto:ilaria.rea@na.isasi.cnr.it)

§ These authors equally contributed to this work.

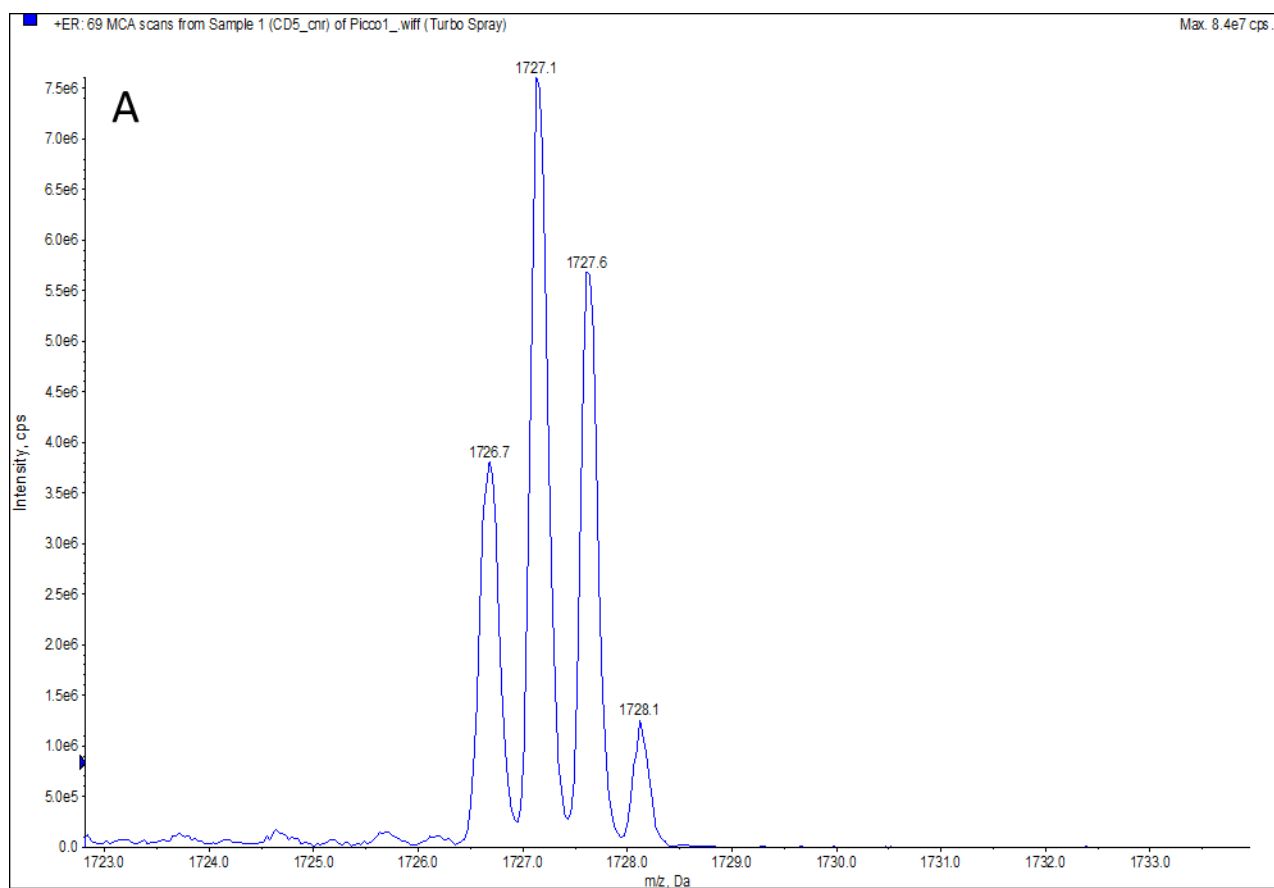

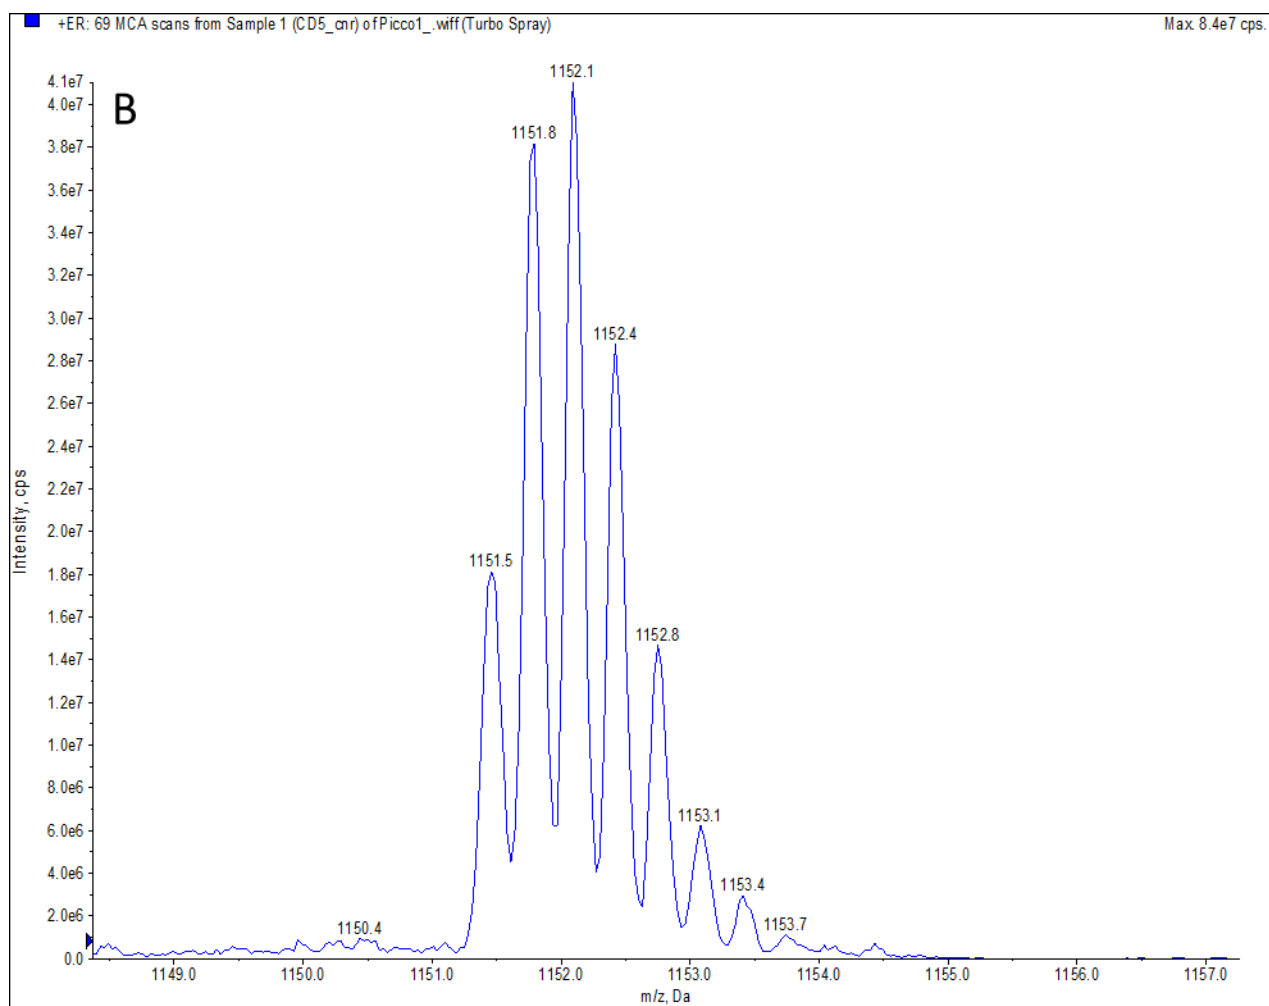

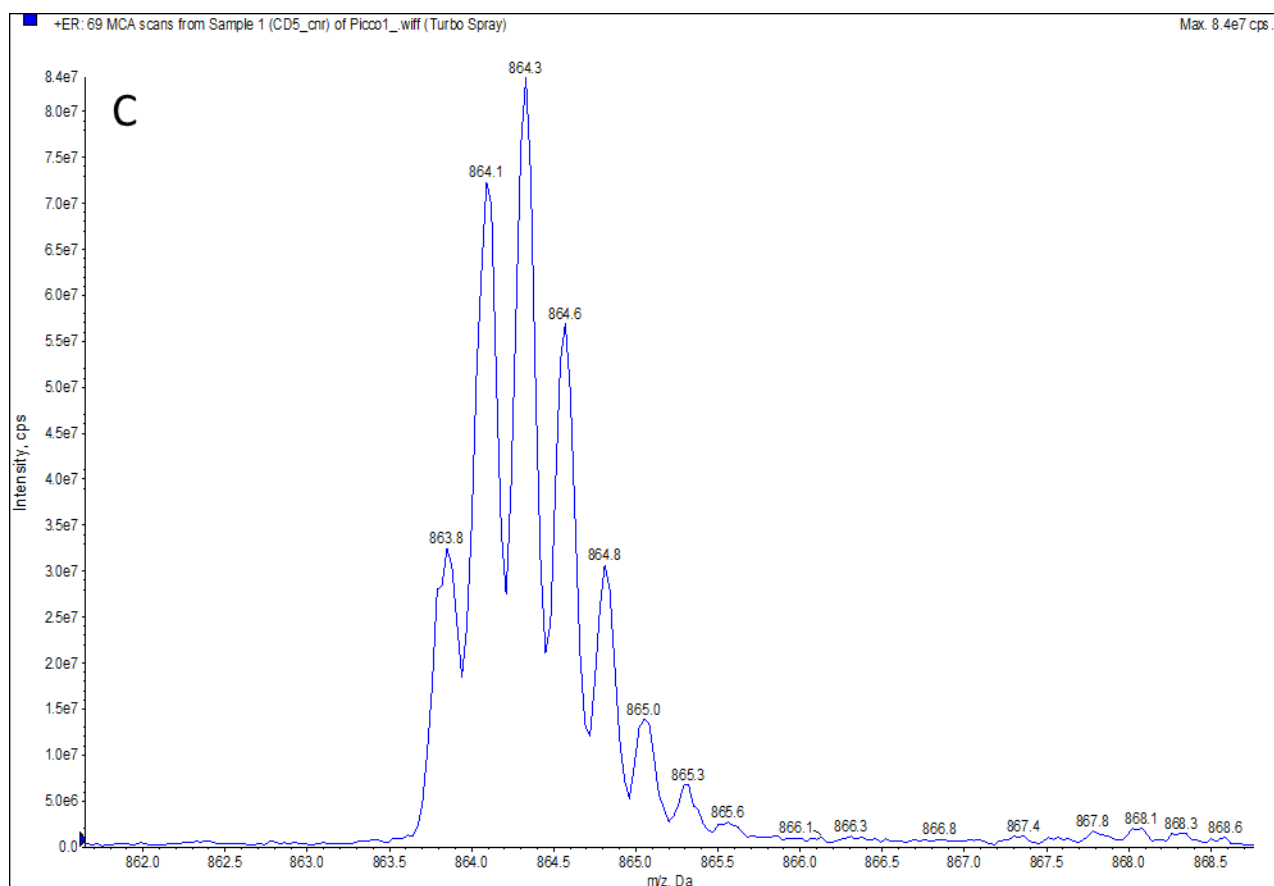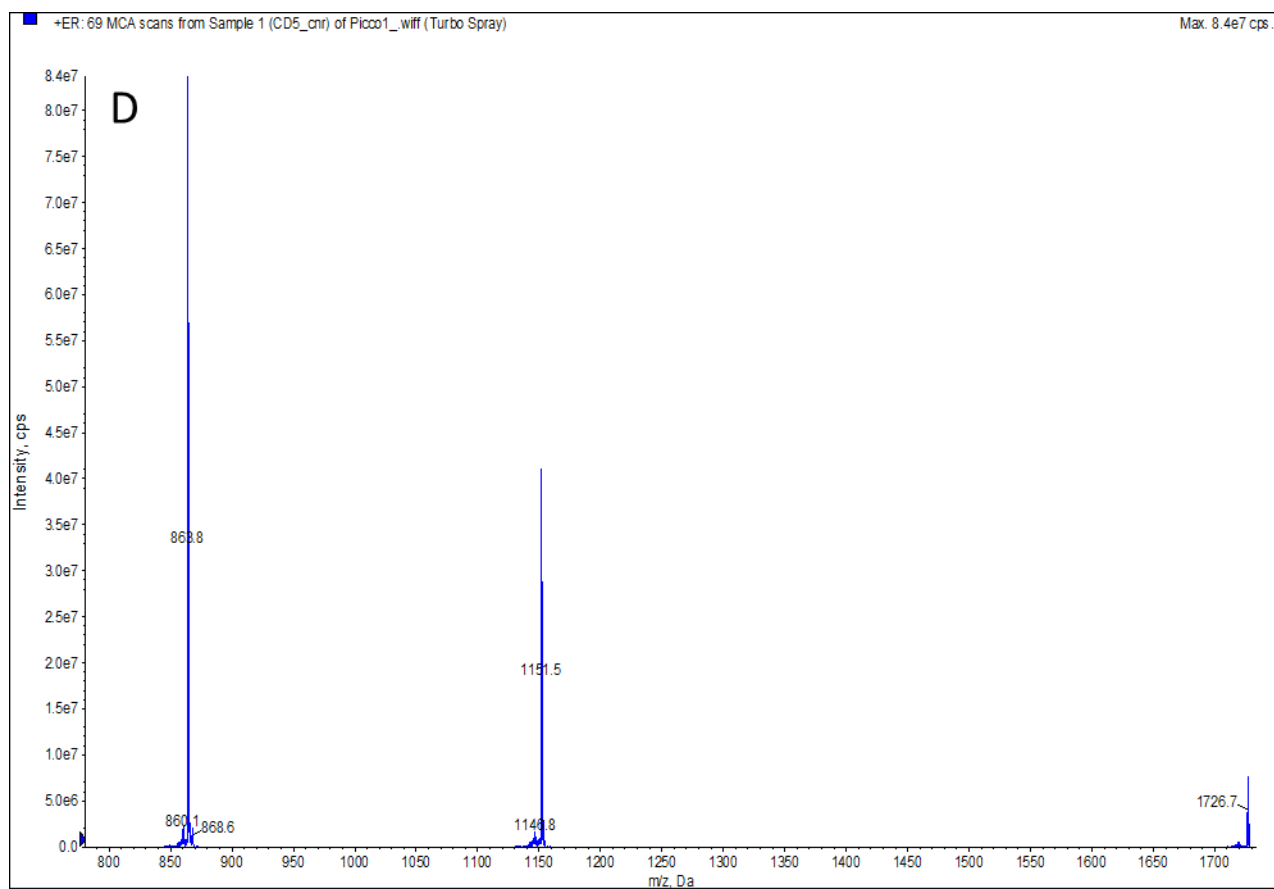

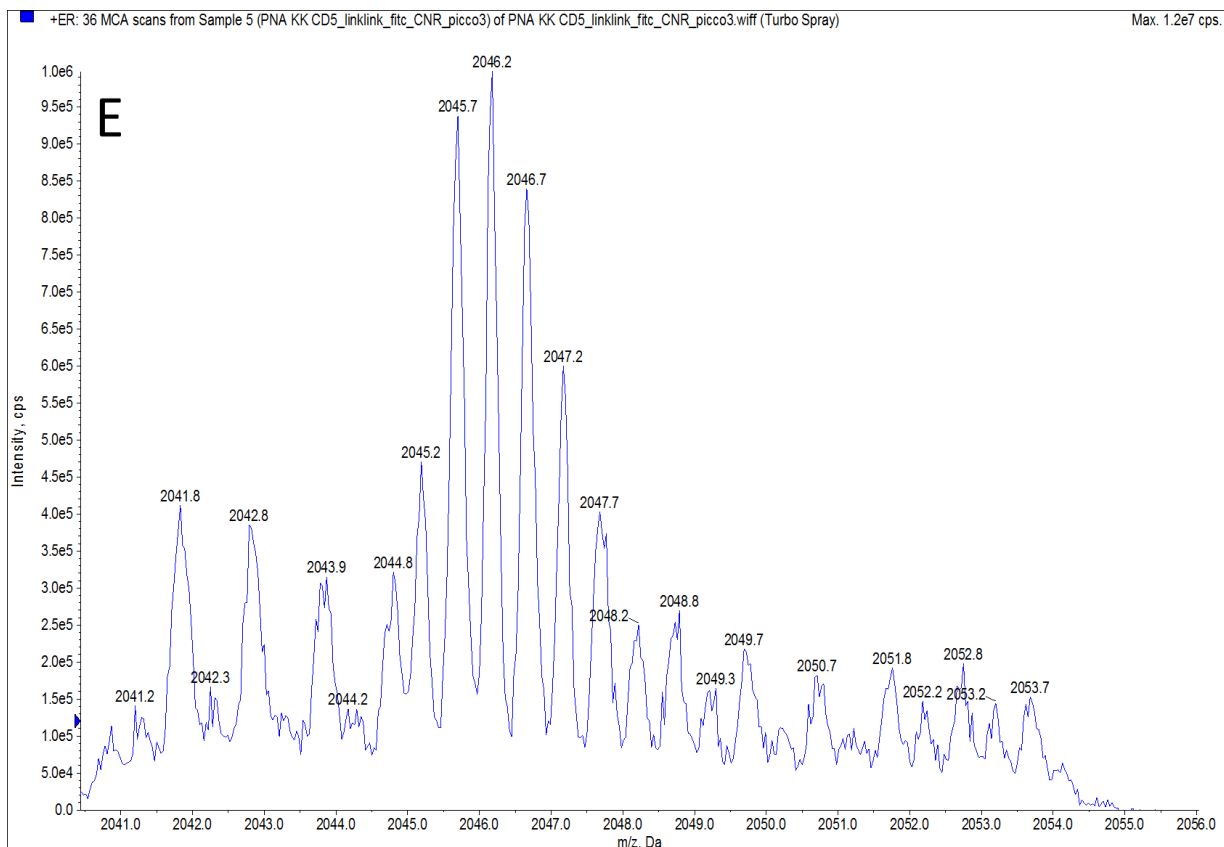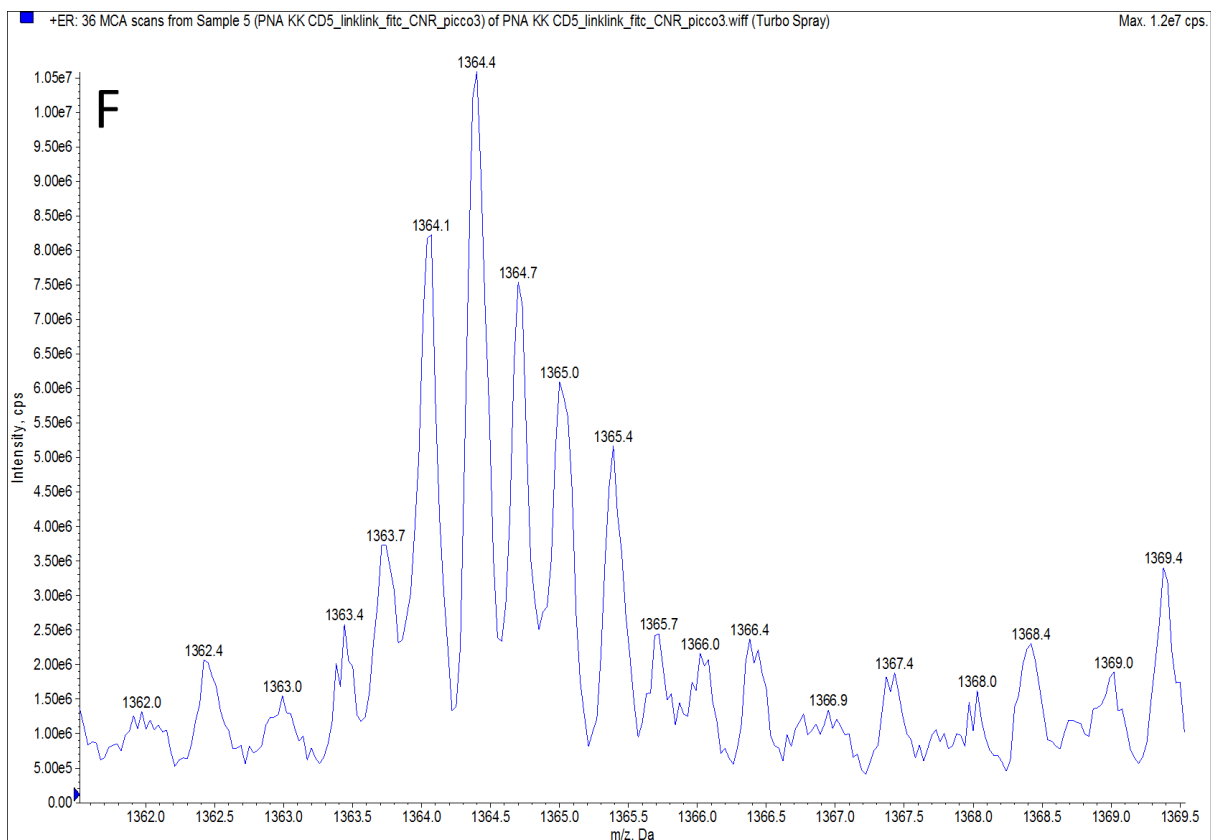

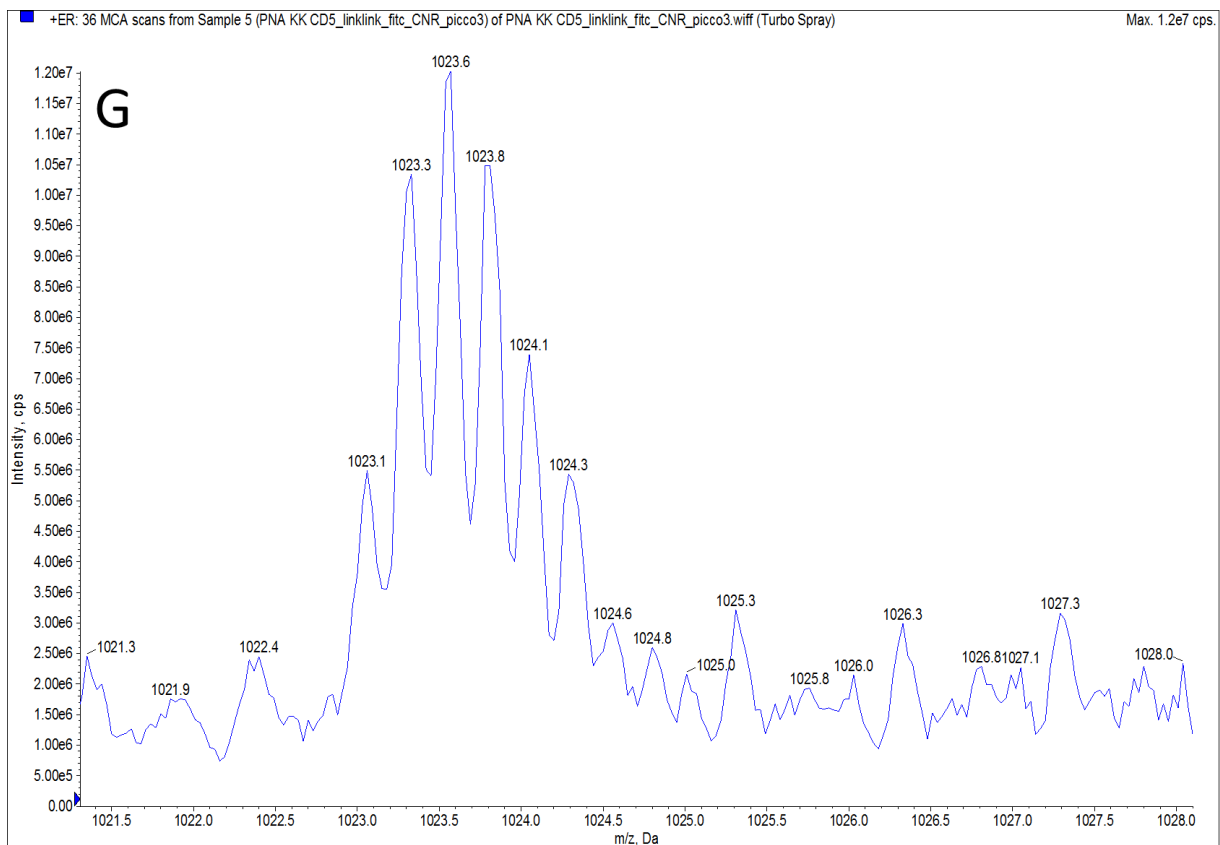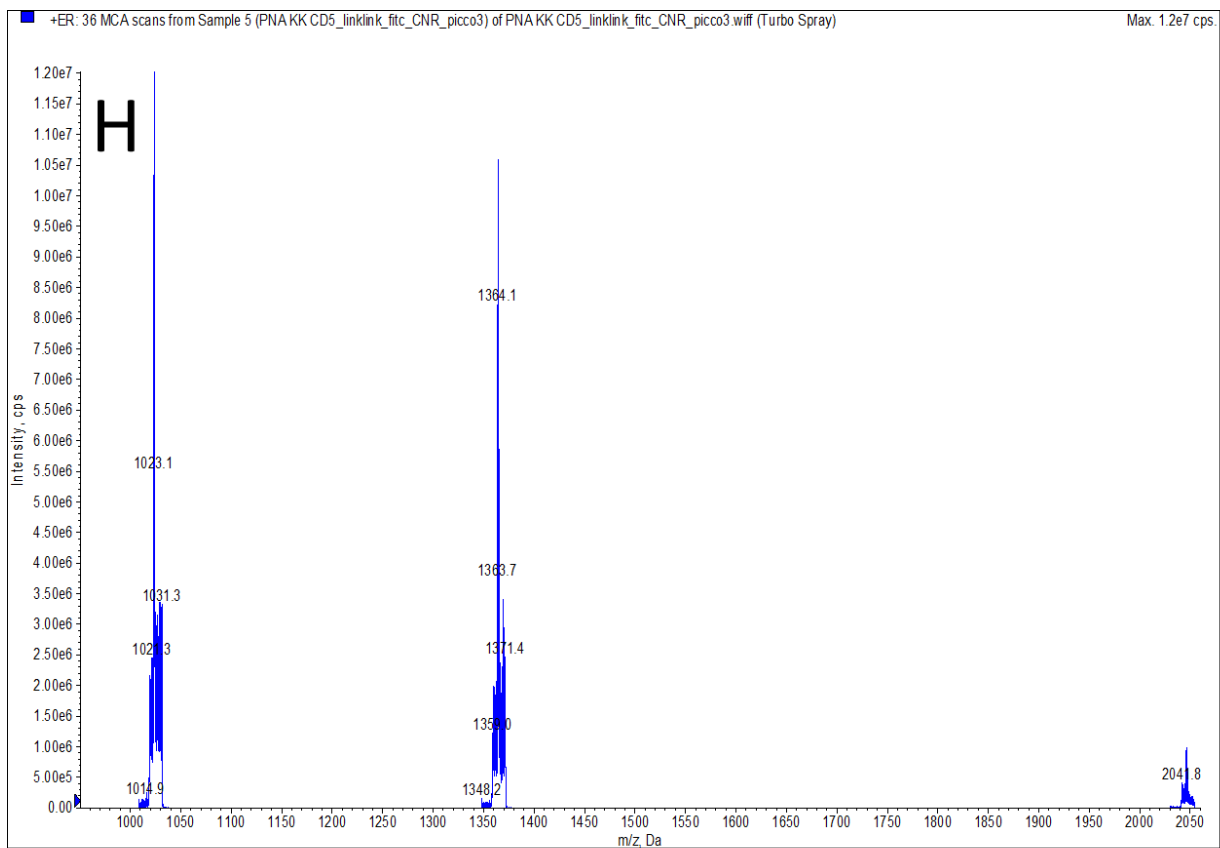

**Figure S1:** (A-D) **PNA:** Expansions of the MCA ESI-MS spectrum ( $m/z$ ) calcd. for  $[M + H]^+$  3452.46, calcd. for  $[M + 2H]^{2+}$  1726.73, found 1726.7, calcd. for  $[M + 3H]^{3+}$  1151.49, found 1151.5; calcd. for  $[M + 4H]^{4+}$  863.86, found 863.8. (E-H) **PNA\*:** Expansions of the MCA ESI-MS spectrum ( $m/z$ ) calcd. for  $[M + H]^+$  4089.64; calcd. for  $[M + 2H]^{2+}$  2045.28, found 2045.2; calcd. for  $[M + 3H]^{3+}$  1363.86, found 1363.7; calcd. for  $[M + 4H]^{4+}$  1023.14, found 1023.1.





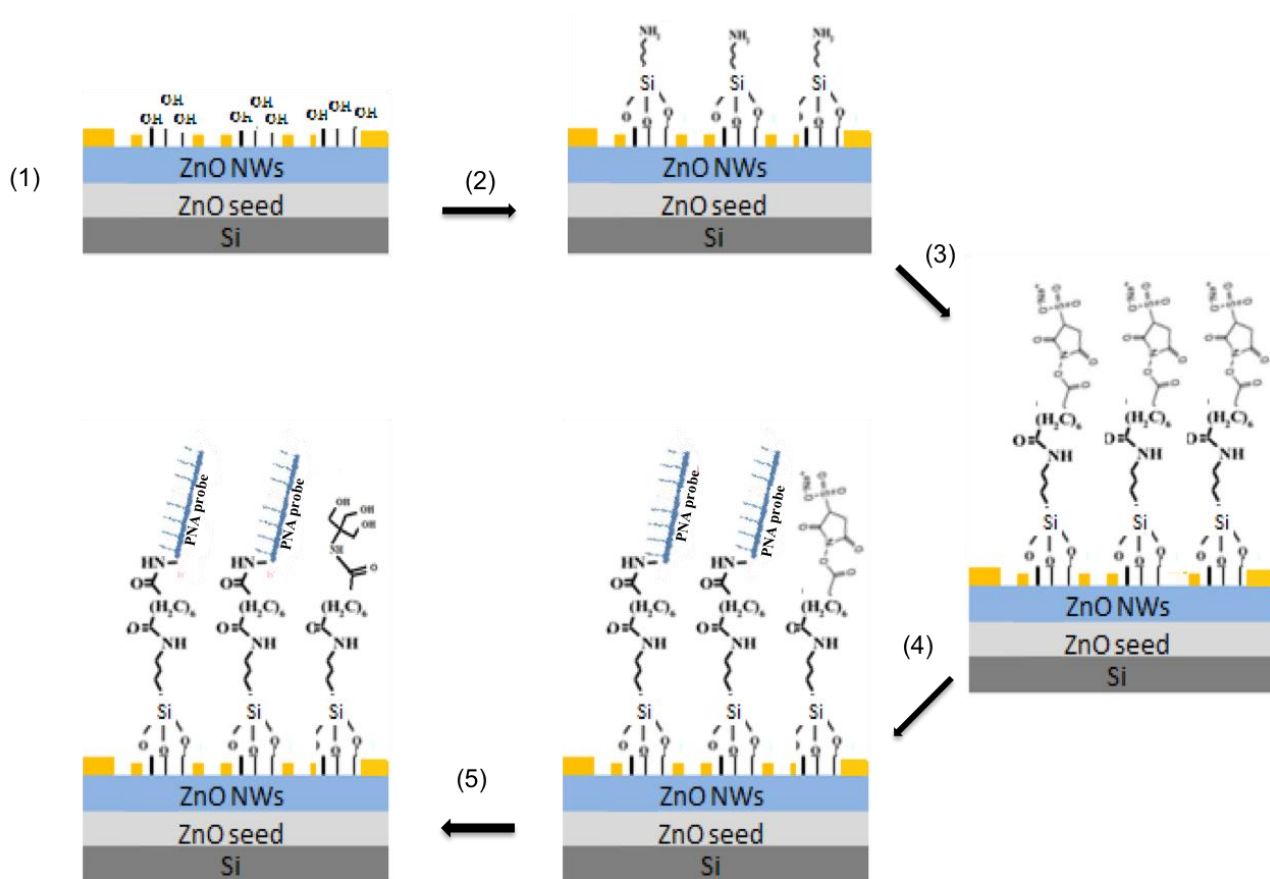

**Figure S2.** Functionalization scheme of ZnONWs surface. (1) Oxygen plasma. (2) Silanization by APTES. (3) BS<sup>3</sup> crosslinker modification. (4) PNA probe immobilization. (5) Surface passivation.

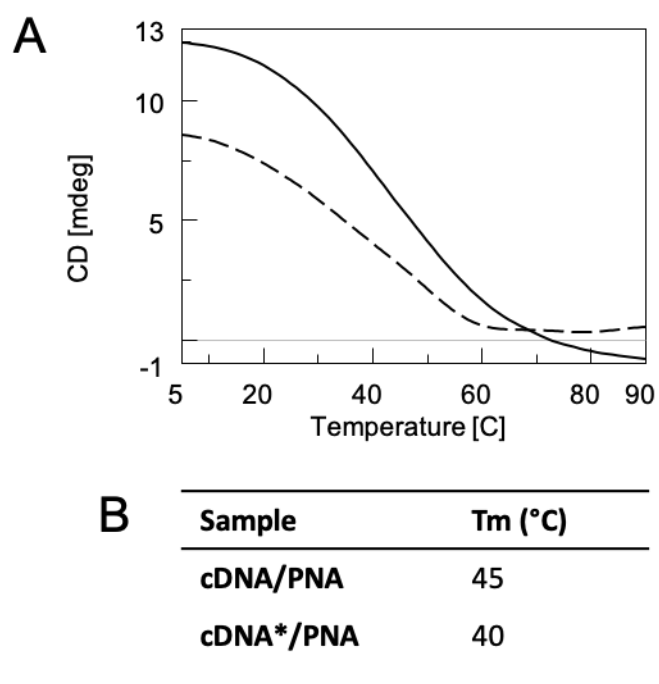

**Figure S3.** (A) CD melting profiles of **cPNA/DNA** mixture (solid line) and **cDNA\*/PNA** (dashed line) at 1:1 ratio. The curves were obtained by monitoring the absorbance at 266 nm, at a heating rate of 0.5 °C/min; (B) Table with T<sub>m</sub> values of each sample.

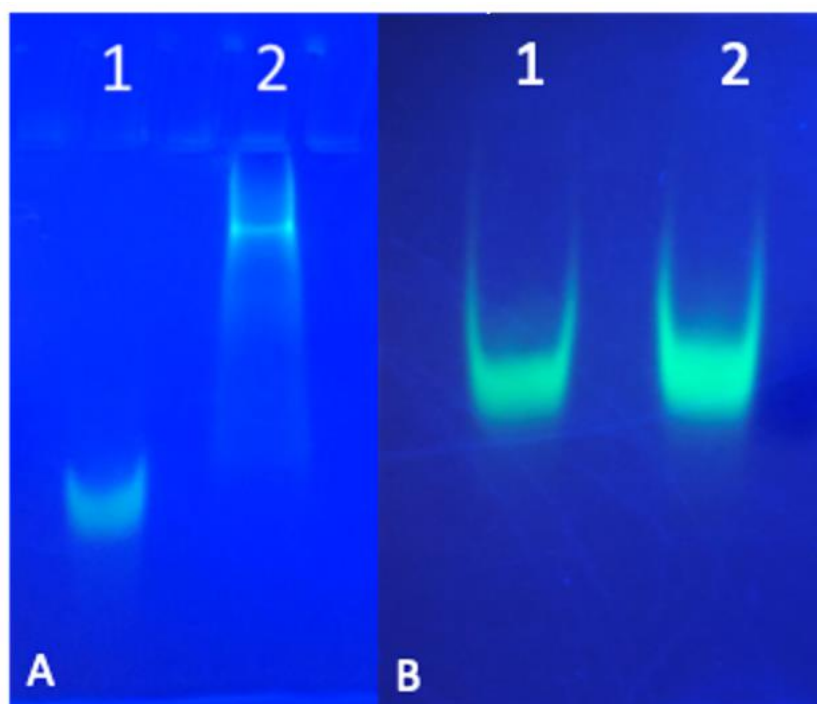

**Figure S4.** PAGE of **cDNA\*** (panel A) or **ctrlIDNA\*** (panel B) annealed alone (lanes 1) or with **PNA** (1:1) (lanes 2) in 100 mM PBS solution.

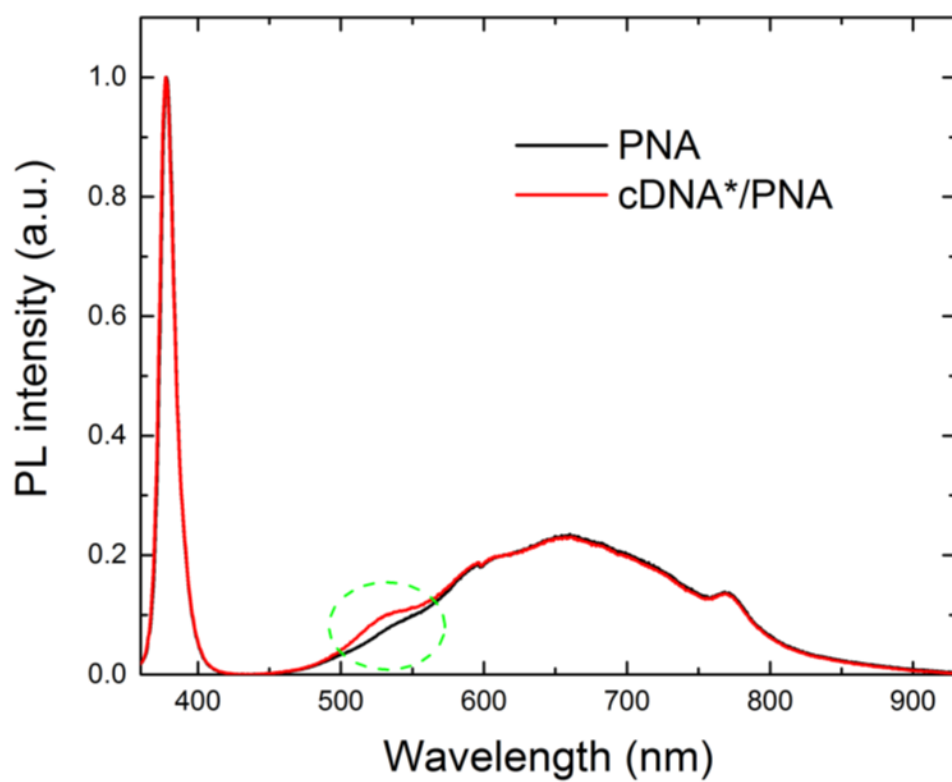

**Figure S5.** PL spectra of ZnONWs after PNA immobilization (black curve) and after interaction with 100  $\mu$ M cDNA\* (red line).
